# Supplementary material for: Structural analysis of the dynamic ribosome-translocon complex
Source: eLife. 2024 Jun 18;13:RP95814. doi: 10.7554/eLife.95814 (PMC11186639; doi:10.7554/eLife.95814)
Supplement: Supplementary file 1. [file elife-95814-supp1.xlsx]

## Sheet: Sheet1
Supplementary File 1. Data collection, refinement, model and validation statistics
Model name	RAMP4-bound Sec61	Rho-bound Sec61 with TRAP, conformation 1	Rho-bound Sec61 with TRAP, conformation 2
Accession codes
EMDB	EMD-19195	EMD-19197	EMD-19198
PDB	8RJB	8RJC	8RJD
Data collection
Voltage (kV)	300
Pixel size (Å)	1.3398
Detector	K3 Summit
Nominal defocus range (μm)	−2.7 to −1.9
Fit defocus mean (μm)	−2
Electron dose (e− frame−1 Å−2)	1
Electron dose (e− Å−2)	54
Data processing
Independent data collections	1
Micrographs collected	17540
Particles picked	1389410
Particles retained	140190	28770	45566
Map sharpening B-factor (Å2)	-27.5712	-22.2527	-21.0619
Overall resolution (Å)	2.69243	2.90061	2.78574
FSC threshold	0.143
Model composition
Chains	51	56	56
Non-hydrogen atoms	244482	255666	255666
Protein residues	7120	7822	7822
RNA bases	3895	3895	3895
Ligands	Mg2+: 218	Mg2+: 218	Mg2+: 218
	Zn2+: 5	Zn2+: 5	Zn2+: 5
Refinement
Model resolution (Å)		2.8	2.7
FSC threshold	0.5
CC (mask)		0.86	0.87
R.M.S deviations
Bond lengths (Å)	0.007	0.005	0.006
Bond angles (°)	0.689	0.598	0.628
Validation
Molprobity score	1.17	1.34	1.22
Clashscore, all atoms	3.58	4.47	4.05
Rotamers outliers (%)		1.07	1
Cβ outliers (%)		0	0.01
Ramachandran plot
Favored (%)	97.9	97.57	97.87
Allowed (%)	2.05	2.4	2.12
Outliers (%)	0.04	0.03	0.01
