# Supplementary figures and images for: Structural analysis of the dynamic ribosome-translocon complex
Source: eLife journal article supplement (doi:10.7554/elife.95814), 2024-04-16

Figure 3F -- source data 2

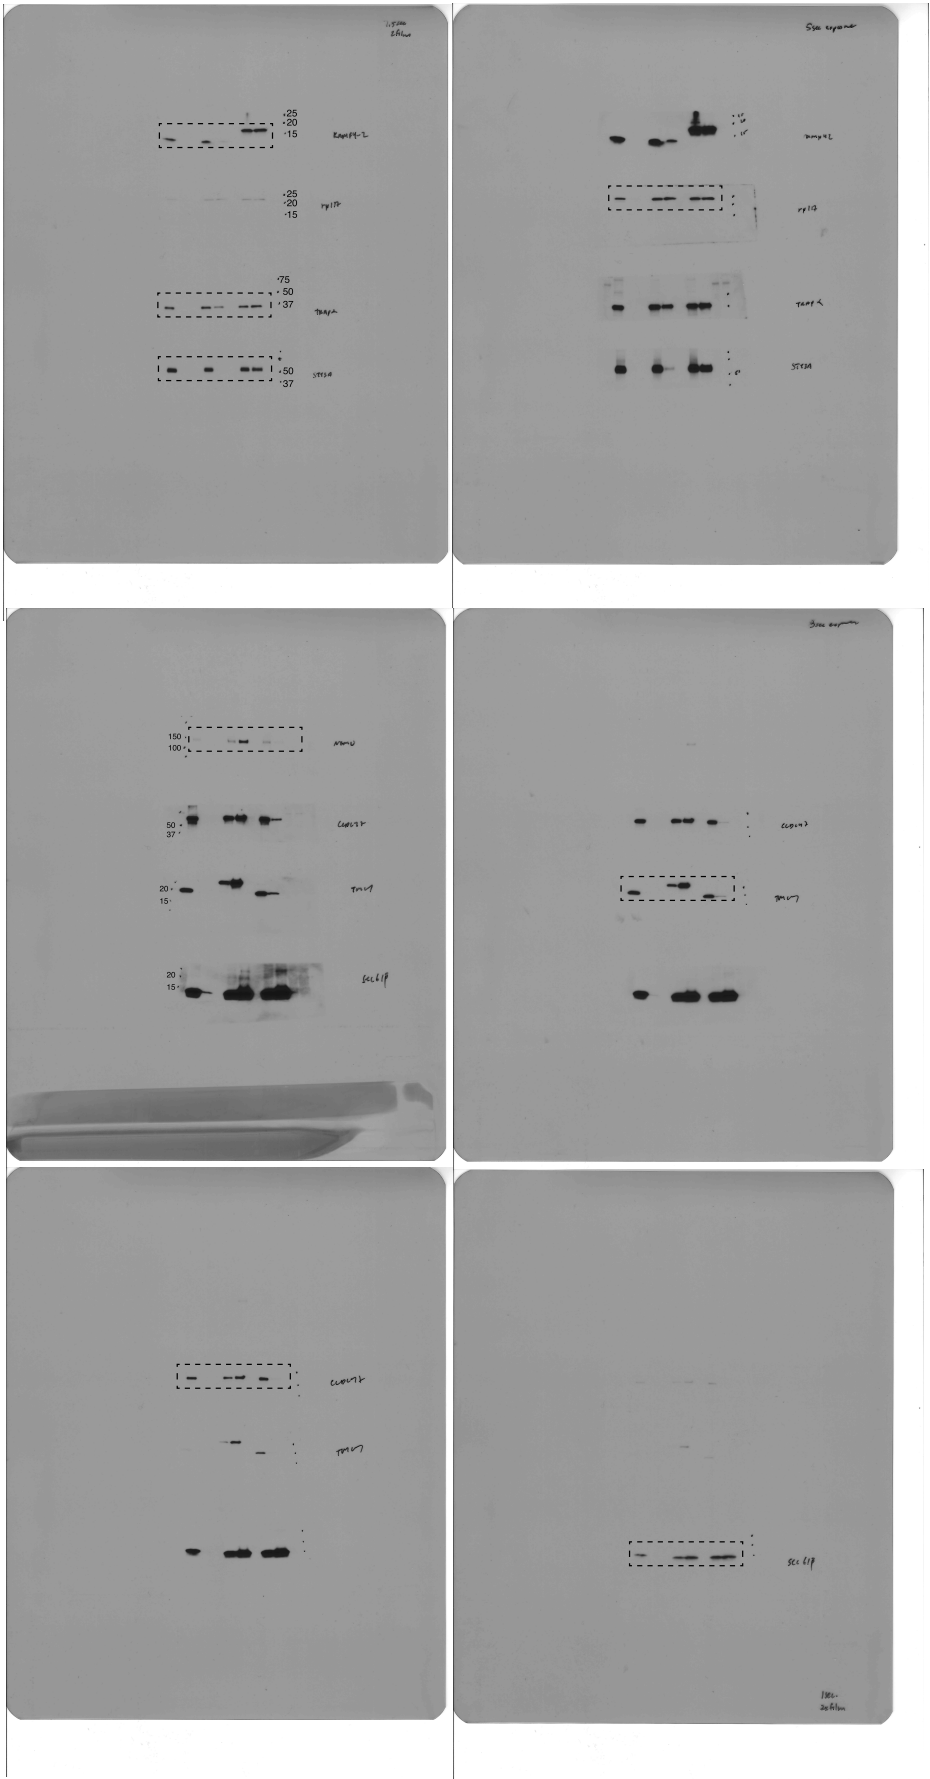

Supplement: fig3-data1 [file elife-95814-fig3-data1-v1.zip]

Figure 3F -- source data 1

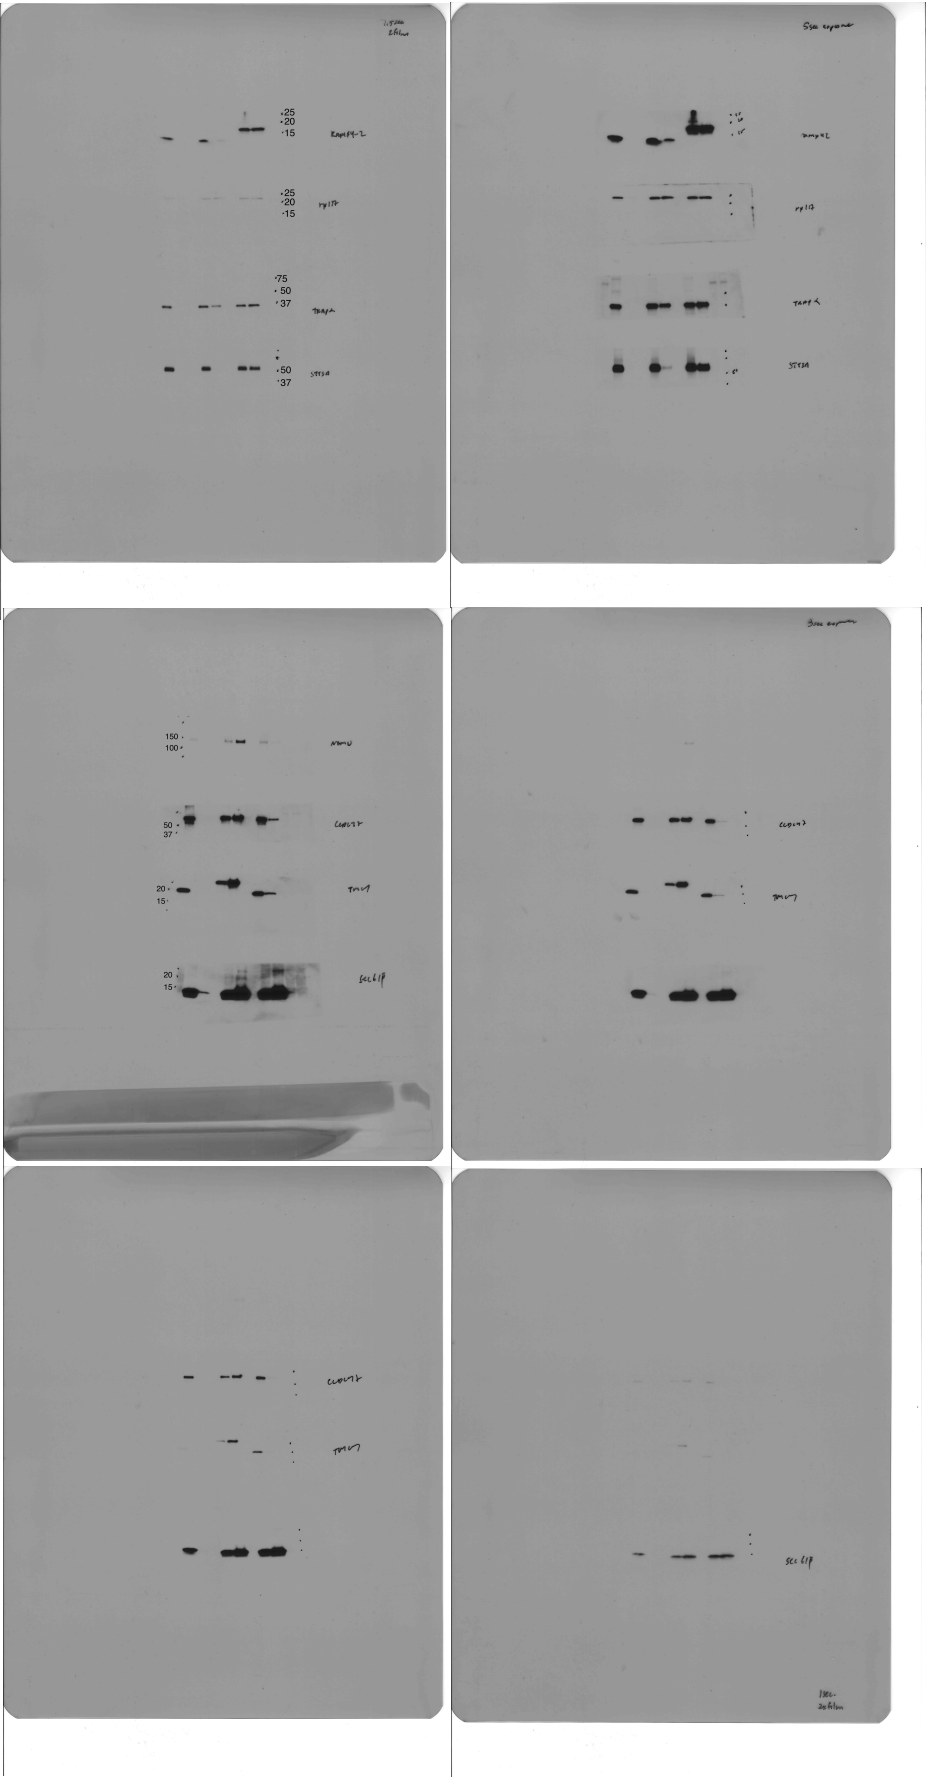

Supplement: fig3-data1 [file elife-95814-fig3-data1-v1.zip]
